# Supplementary material for: AC magnetorheology of polymer magnetic composites
Source: Royal Society of Chemistry journal article supplement (doi:10.1039/d2ma00473a), 2022-01-01
Supplement: d2ma00473a1.pdf [file d2ma00473a1.pdf]

## Supplementary Information

### AC Magnetorheology of Polymer Magnetic Composites

Richa Chaudhary, V. Chaudhary, R. V. Ramanujan, Terry W. J. Steele\*

School of Materials Science and Engineering, Nanyang Technological University (NTU),  
Singapore 639798

\*Email: [wjsteele@ntu.edu.sg](mailto:wjsteele@ntu.edu.sg)

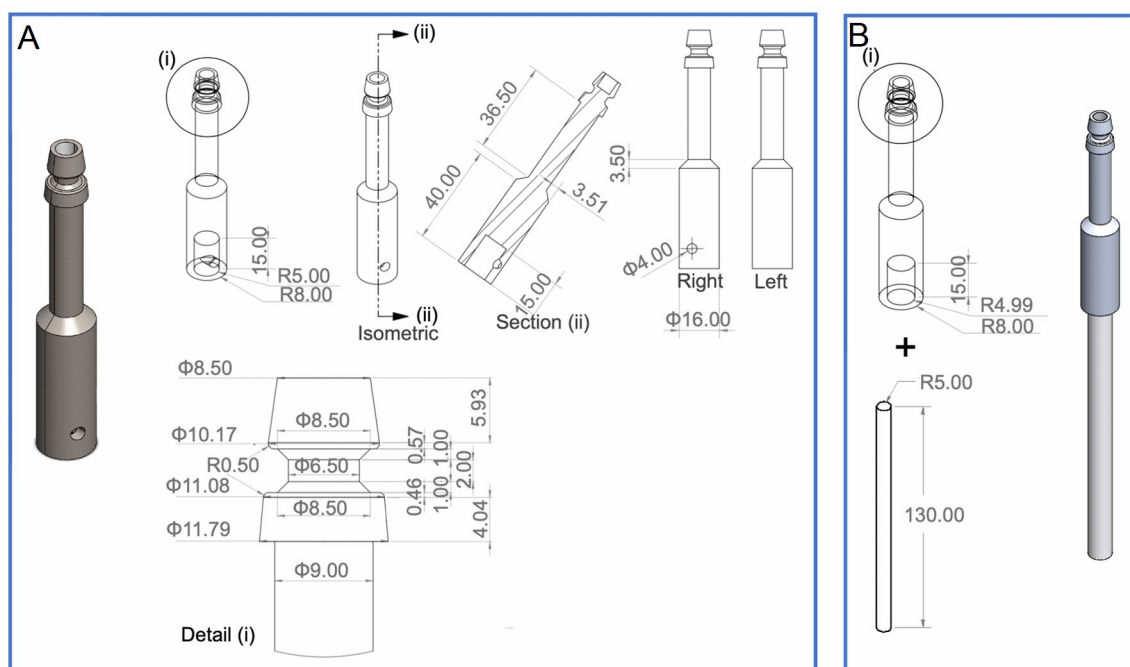

**Fig. S1.** Magnetorheometry measuring probe. (A) Stainless steel shaft used with disposable screwed-in probes of different materials; (B) Shrink-fitted stainless steel shaft with ceramic (MACOR) probe. All dimensions in millimetres.

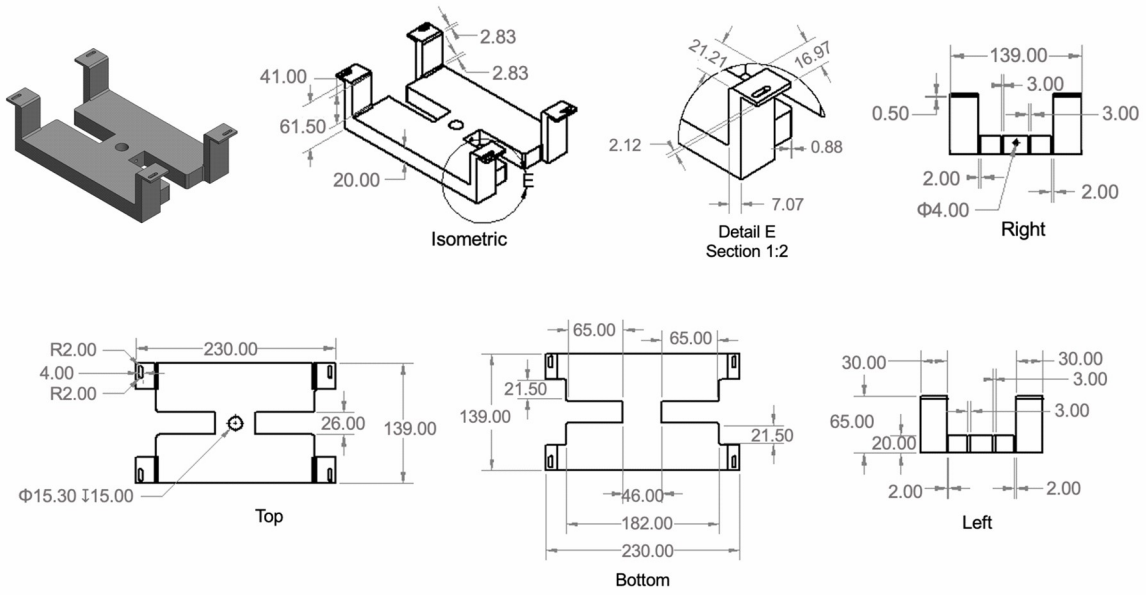

**Fig. S2.** CAD illustration of different views of base plate fixture (dimensions are in millimetres).

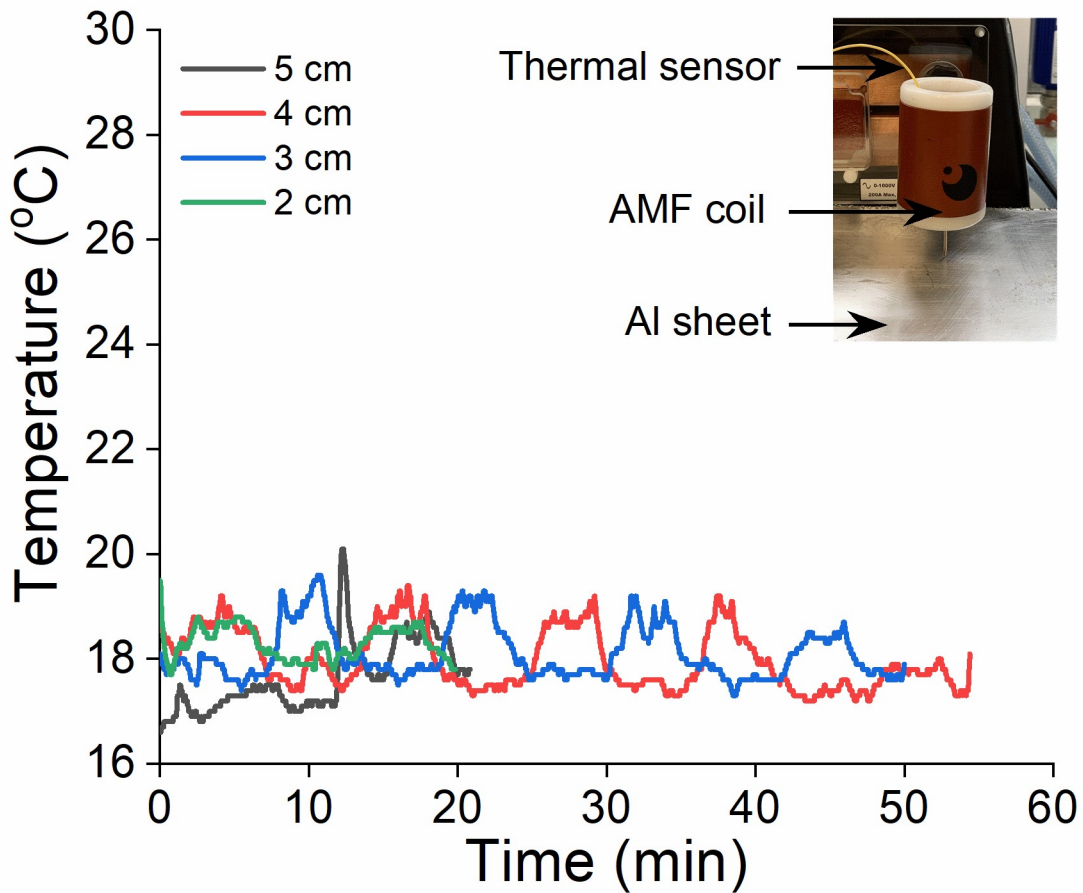

**Fig. S3.** AMF heating on aluminium sheet below S32 coil at 140 Oe.

**Table 1.** Material selection properties

| Materials                      | Tensile strength (MPa) | Coefficient of thermal expansion ( $^{\circ}\text{C}$ ) | Thermal stability ( $^{\circ}\text{C}$ ) |
|--------------------------------|------------------------|---------------------------------------------------------|------------------------------------------|
| Ceramic                        | 345*                   | $90 \times 10^{-7}$                                     | 800                                      |
| Glass reinforced plastic (GRP) | 160                    | $2-3 \times 10^{-5}$                                    | 260                                      |
| Polytetrafluoroethylene (PTFE) | 25                     | $13 \times 10^{-5}$                                     | 260                                      |
| Acrylic                        | 80                     | $75 \times 10^{-5}$                                     | 160                                      |
| Wood                           | 78                     | $5 \times 10^{-6}$                                      | 200-250                                  |
| Stainless steel 304            | 564                    | $17.3 \times 10^{-6}$                                   | 900                                      |

\*Compressive strength

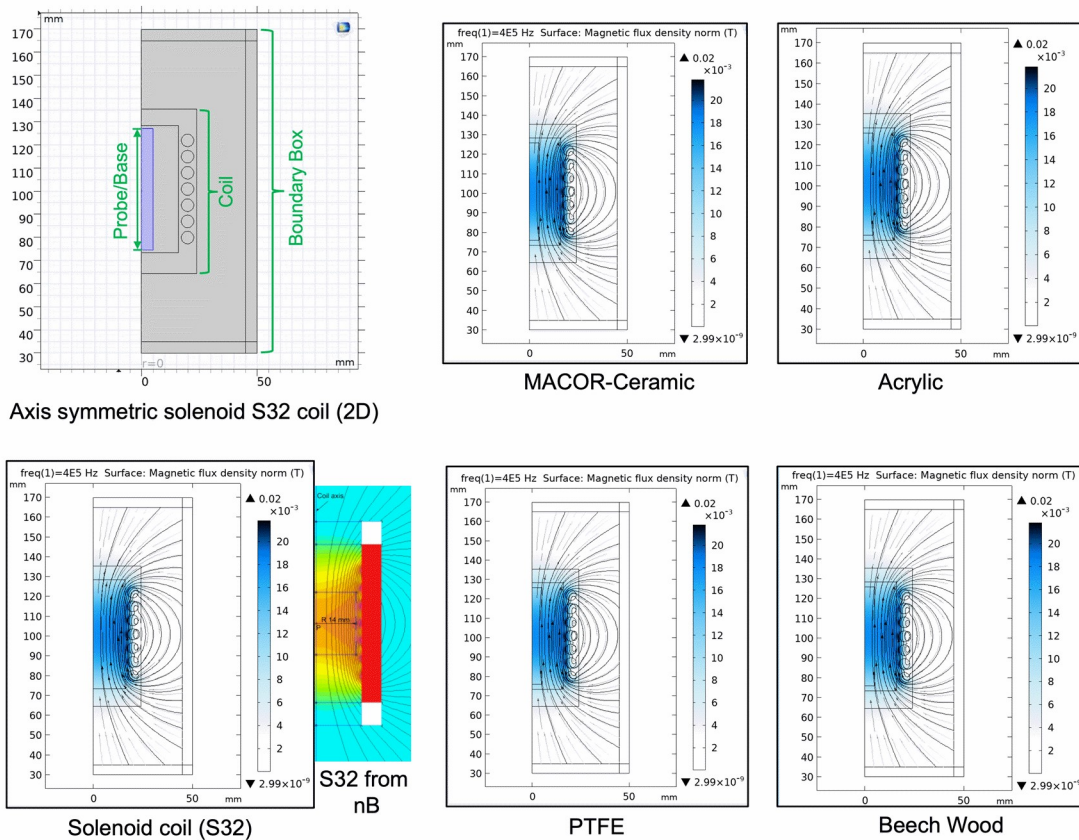

**Fig. S4.** COMSOL simulations to check the magnetic field attenuation in different materials.

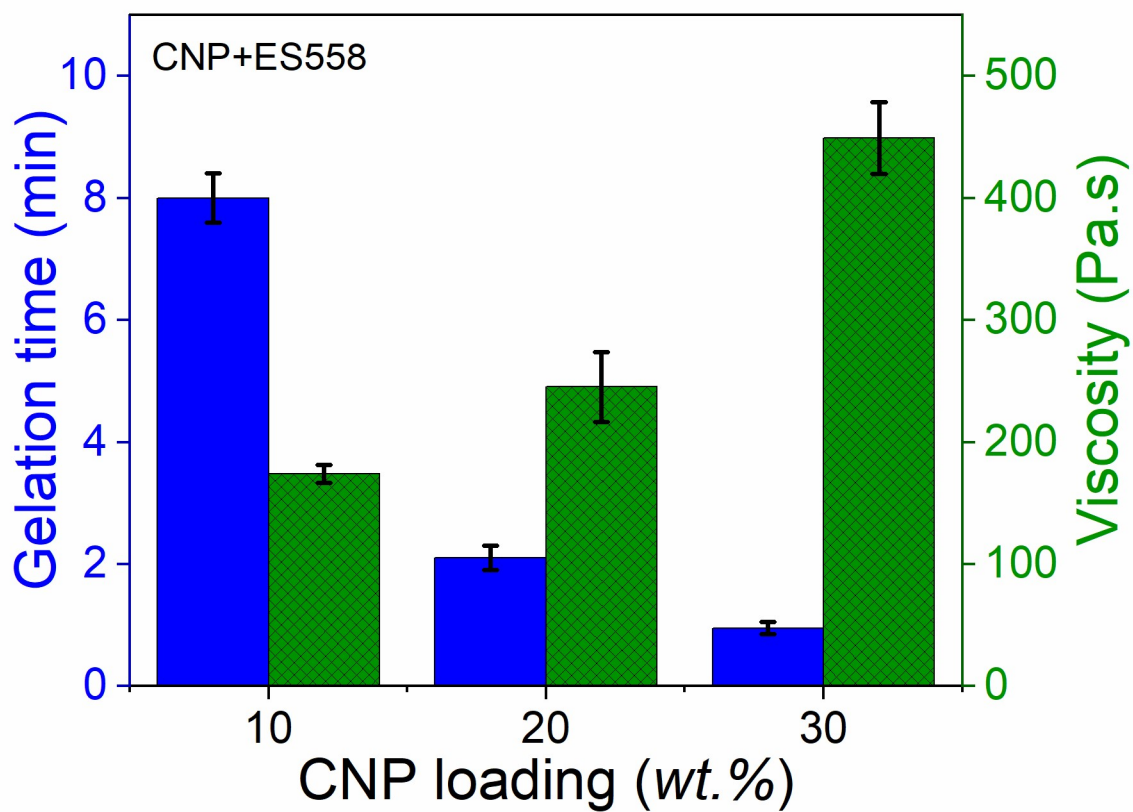

**Fig. S5.** Gelation time of the magnetoadhesives upon AMF application and apparent viscosity of pre-crosslinked magnetoadhesives

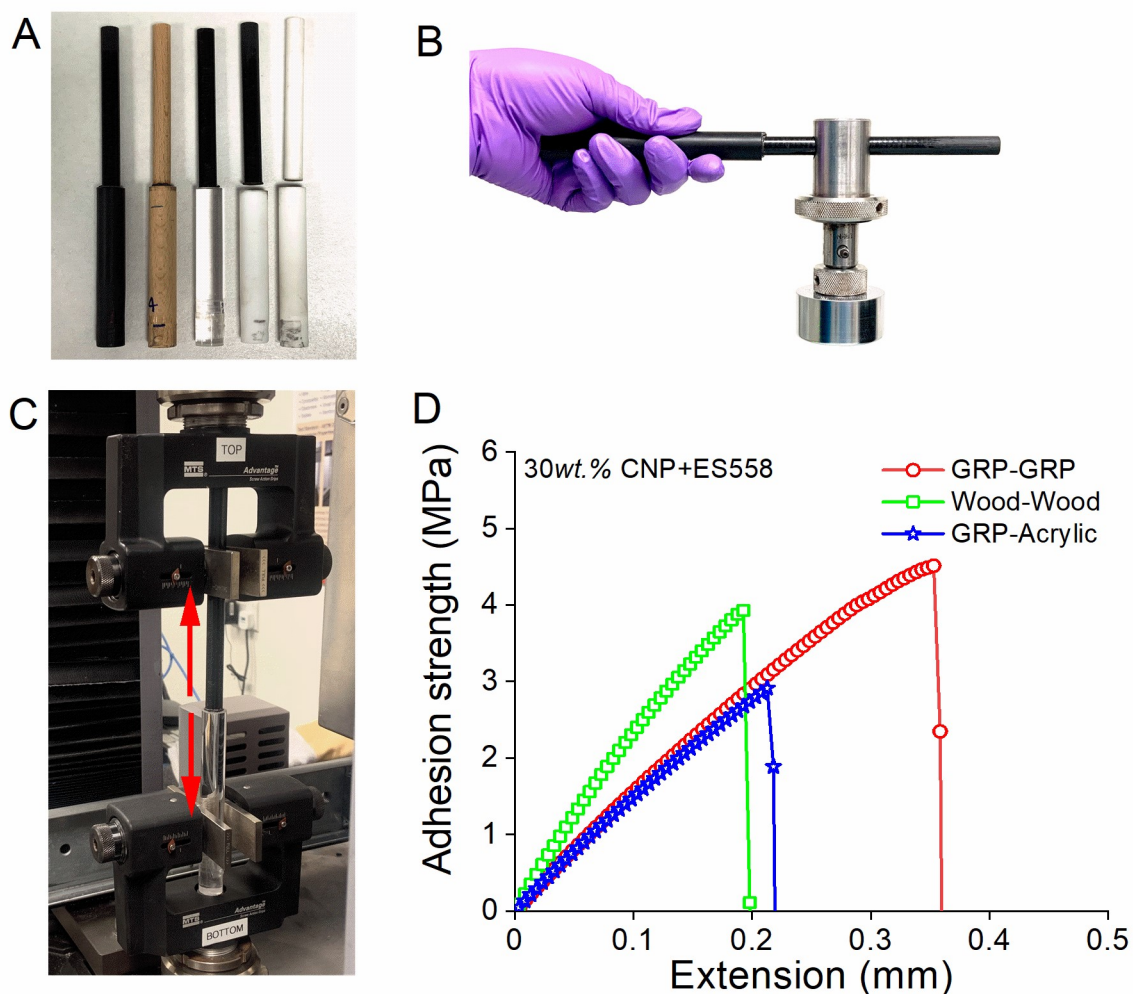

**Fig. S6.** Demonstration of magnetocured samples. **(A)** Different probe-base plates cured during real-time Magnetorheology (left to right: GRP probe-GRP base; Wood probe-Wood base; GRP probe-Acrylic base; GRP probe-PTFE base; Ceramic probe-Ceramic base); **(B)** GRP probe-GRP base cured during Magnetorheology hanging 5kg weight; **(C)** Tensile testing setup; **(D)** Lap shear adhesion strength of cured samples during AC Magnetorheology.
